# Supplementary material for: Isolation of a Multidrug-Resistant vanA-Positive Enterococcus faecium Strain from a Canine Clinical Sample in Greece
Source: MDPI journal article supplement (doi:10.3390/microbiolres14020042), 2023-04-30
Supplement: s1 [file s1]

Archive with 1 entries (1 files):
- microbiolres-2305575-supplementary.pdf
