# Supplementary material for: Isolation of a Multidrug-Resistant vanA-Positive Enterococcus faecium Strain from a Canine Clinical Sample in Greece
Source: MDPI journal article supplement (doi:10.3390/microbiolres14020042), 2023-04-30
Supplement: s1 [file s1 › microbiolres-2305575-supplementary.pdf]

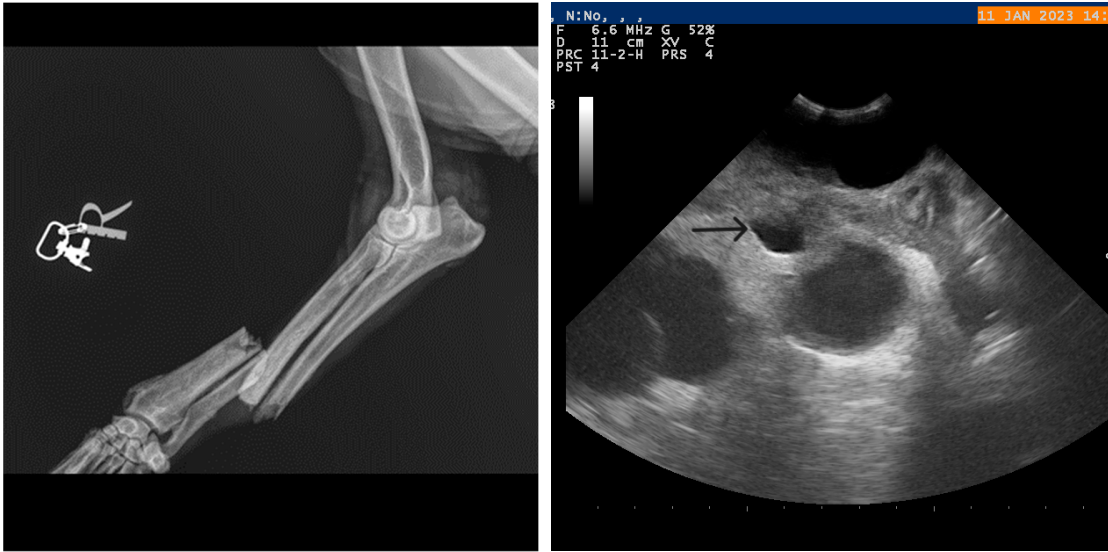

**Figure S1.** (a) X-ray image from the dog showing the fracture in the radius; (b) Ultrasound image showing the paraprostatic cyst (pointed with black arrow) from the same dog.

|                                                               |                                              |        |
|---------------------------------------------------------------|----------------------------------------------|--------|
| GENIKO NOMARX.NOSOKOMEIO LARISAS"KOYTLIMPANEIO&TRIANAFYLLEIO" |                                              |        |
| TSAKALOF 1                                                    |                                              |        |
| 41221 LARISA                                                  |                                              |        |
| VITEK 2                                                       |                                              |        |
| Isolate ID: L758409                                           |                                              |        |
| Accession Number: 11235726                                    |                                              |        |
| Name: VREF -                                                  |                                              |        |
| CARD GP                                                       |                                              |        |
| Isolate 1: Enterococcus faecium                               |                                              |        |
| No                                                            | Biochemical test                             | Result |
| 1                                                             | D- Amygdalin                                 | -      |
| 2                                                             | Ala- Phe - Pro Arylamidase                   | -      |
| 3                                                             | Leucine Arylamidase                          | -      |
| 4                                                             | Alanine Arylamidase                          | -      |
| 5                                                             | D-Ribose                                     | +      |
| 6                                                             | Novobiocin Resistance                        | +      |
| 7                                                             | D-Rifinase                                   | +      |
| 8                                                             | Optochin Resistance                          | +      |
| 9                                                             | Phosphatidylinositol Phospholipase C         | -      |
| 10                                                            | Cyclodextrine                                | -      |
| 11                                                            | L- Proline Arylamidase                       | -      |
| 12                                                            | Tyrosine Arylamidase                         | +      |
| 13                                                            | L-Lactate Alkalization                       | -      |
| 14                                                            | Growth in 6.5% NaCl                          | +      |
| 15                                                            | O/129 Resistance (comp.Vibrio)               | +      |
| 16                                                            | D-Xylose                                     | -      |
| 17                                                            | L-Aspartate Arylamidase                      | -      |
| 18                                                            | Beta Glucuronidase                           | -      |
| 19                                                            | D-Sorbitol                                   | -      |
| 20                                                            | Lactose                                      | +      |
| 21                                                            | D Mannitol                                   | +      |
| 22                                                            | Salicin                                      | +      |
| 23                                                            | Arginine Dihydrolase                         | +      |
| 24                                                            | Beta Galactopyranosidase Resorufine          | -      |
| 25                                                            | Alpha Galactosidase                          | +      |
| 26                                                            | Urease                                       | -      |
| 27                                                            | N-Acetyl-D-Glucosamine                       | +      |
| 28                                                            | d-Mannose                                    | +      |
| 29                                                            | Saccharose/Sucrose                           | +      |
| 30                                                            | Beta Galactosidase                           | -      |
| 31                                                            | Alpha -Mannosidase                           | -      |
| 32                                                            | L-Pyrrolydonyl-Arylamidase                   | +      |
| 33                                                            | Polymixin B Resistance                       | +      |
| 34                                                            | d-Maltose                                    | +      |
| 1                                                             |                                              |        |
| GENIKO NOMARX.NOSOKOMEIO LARISAS"KOYTLIMPANEIO&TRIANAFYLLEIO" |                                              |        |
| TSAKALOF 1                                                    |                                              |        |
| 41221 LARISA                                                  |                                              |        |
| 35                                                            | Methyl - B-D-Glucorinadioside                | -      |
| 36                                                            | d-Trehalose                                  | +      |
| 37                                                            | Alpha - Glucosidase                          | +      |
| 38                                                            | Phosphatase                                  | -      |
| 39                                                            | Beta- Glucuronidase                          | -      |
| 40                                                            | D-Galactose                                  | +      |
| 41                                                            | Bacitracin Resistance                        | +      |
| 42                                                            | Pullulane                                    | -      |
| 43                                                            | Arginine Dihydrolase 2 (Thioglucolate Sigma) | +      |
| 2                                                             |                                              |        |

**Figure S2.** Vitek 2 Biochemical Identification Report .

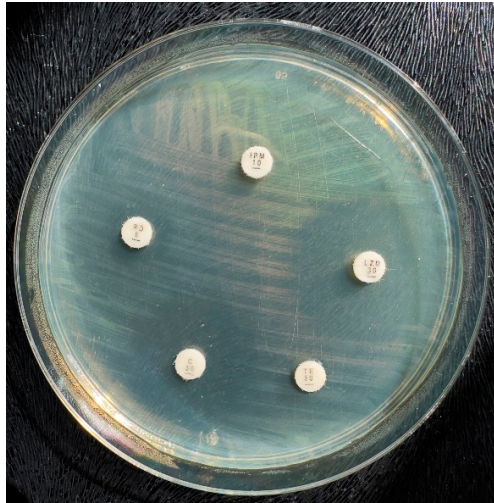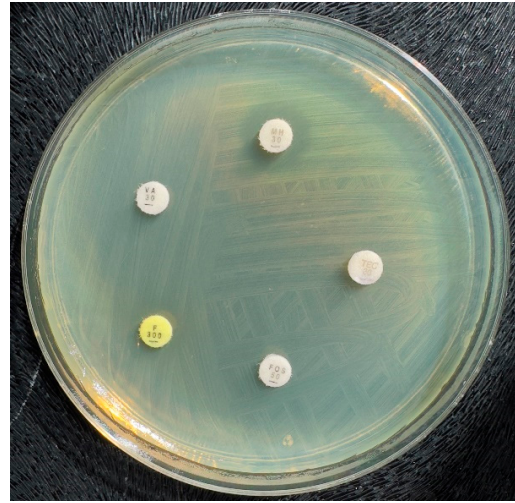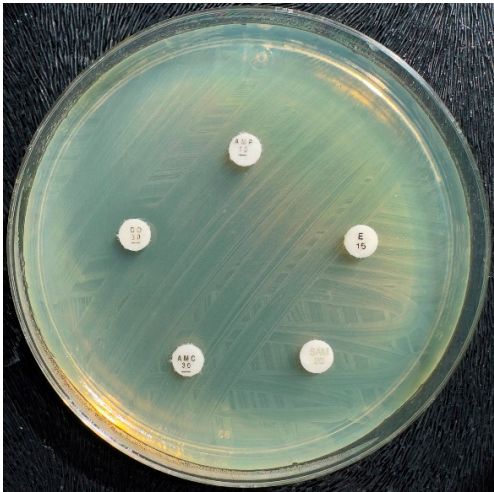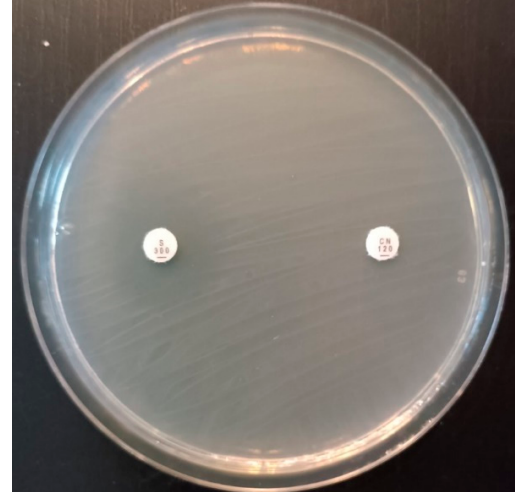

**Figure S3.** Petri dishes of Disc Diffusion Test. [AMP: Ampicillin, AMC: Amoxicillin-clavulanate, SAM: Ampicillin-Sulbactam, IMP: Imipenem, E: Erythromycin, TE: Tetracycline, DO: Doxycycline, MH: Minocycline, F: Nitrofurantoin, FOS: Fosfomycin, VA: Vancomycin, TEC: Teicoplanin, RD: Rifampin, LZD: Linezolid, C: Chloramphenicol, S: Streptomycin (high-level), CN: Gentamicin (high-level)]

bioMérieux Customer: **Laboratory Report** Printed by: 123456  
Patient ID: L758409

System #:   
 Patient Name: VREF -   
 Isolate: 11235726-1 (Approved)   
 Card Type: GP Bar Code: 2422214503569292 Testing Instrument: 00000B4B8378 (1615)   
 Card Type: AST-P613 Bar Code: 4932182203403047 Testing Instrument: 00000B4B8378 (1615)   
 Setup Technologist: 123456 123456(123456)   
 Bionumber: 012003265771771   
 Organism Quantity: Selected Organism: Enterococcus faecium

Comments:

|                                                                                                                                                                     |                                                                                                                |                           |                                   |
|---------------------------------------------------------------------------------------------------------------------------------------------------------------------|----------------------------------------------------------------------------------------------------------------|---------------------------|-----------------------------------|
| <b>Identification Information</b>                                                                                                                                   | Card: GP                                                                                                       | Lot Number: 2422214503    | Expires: Dec 19, 2023 12:00 EET   |
|                                                                                                                                                                     | Status: Final                                                                                                  | Analysis Time: 4.80 hours | Completed: Feb 23, 2023 20:40 EET |
| <b>Organism Origin</b>                                                                                                                                              | VITEK 2                                                                                                        |                           |                                   |
| <b>Selected Organism</b>                                                                                                                                            | 97% Probability <b>Enterococcus faecium</b><br>Bionumber: 012003265771771 Confidence: Excellent identification |                           |                                   |
| <b>Analysis Organisms and Tests to Separate:</b>                                                                                                                    |                                                                                                                |                           |                                   |
| <b>Analysis Messages:</b><br>The following antibiotic(s) are not claimed:<br>Cefoxitin Screen, Daptomycin, Gentamicin, Inducible Clindamycin Resistance, Oxacillin, |                                                                                                                |                           |                                   |
| <b>Contraindicating Typical Biopattern(s)</b><br>Enterococcus faecium dRAF(15),                                                                                     |                                                                                                                |                           |                                   |

|                                   |                |                            |                                   |
|-----------------------------------|----------------|----------------------------|-----------------------------------|
| <b>Susceptibility Information</b> | Card: AST-P613 | Lot Number: 4932182203     | Expires: Nov 17, 2023 12:00 EET   |
|                                   | Status: Final  | Analysis Time: 11.92 hours | Completed: Feb 24, 2023 03:49 EET |

| Antimicrobial                   | MIC   | Interpretation | Antimicrobial                     | MIC     | Interpretation |
|---------------------------------|-------|----------------|-----------------------------------|---------|----------------|
| Ampicillin                      | >= 32 | R              | Inducible Clindamycin Resistance  |         |                |
| Benzylpenicillin                | (-)   | (-)            | Linezolid                         | 2       | S              |
| Cefoxitin Screen                |       |                | Moxifloxacin                      | (-)     | (-)            |
| Ciprofloxacin                   | >= 8  | R              | Oxacillin                         |         |                |
| Clindamycin                     | (-)   | (-)            | Quinupristin/Dalfopristin         | 0.5     | S              |
| Daptomycin                      | 2     | IE             | Streptomycin High Level (synergy) | SYN-S   | S              |
| Erythromycin                    | (-)   | (-)            | Teicoplanin                       | >= 32   | R              |
| Gentamicin                      |       |                | Tigecycline                       | <= 0.12 | S              |
| Gentamicin High Level (synergy) | SYN-R | R              | Trimethoprim/Sulfamethoxazole     |         |                |
| Imipenem                        | >= 16 | R              | Vancomycin                        | >= 32   | R              |

(-) = Susceptibility testing not recommended; species is a poor target for therapy

|                          |                                      |                                           |
|--------------------------|--------------------------------------|-------------------------------------------|
| <b>AES Findings:</b>     | Last Modified: Dec 5, 2022 12:36 EET | Parameter Set: Copy of EUCAST +Phenotypic |
| <b>Confidence Level:</b> | Consistent                           |                                           |

Installed VITEK 2 Systems Version: 9.03.3  
 MIC Interpretation Guideline: Copy of EUCAST 2012  
 AES Parameter Set Name: Copy of EUCAST+Phenotypic

Therapeutic Interpretation Guideline: Copy of PHENOTYPIC  
 AES Parameter Last Modified: Dec 5, 2022 12:36 EET  
 Page 1 of 2

**Figure S4.** Vitek 2 MIC Report . Daptomycin MIC is hand-written, as the result can only be reported if *E. faecalis* is manually selected as the organism under investigation (relevant image available if requested).
